# Supplementary material
Source: MDPI journal article supplement (https://www.mdpi.com/2076-3417/9/2/229)
Supplement: s1 [file s1]

# Comparison between OCl<sup>-</sup>-Injection and In Situ Electrochlorination in the Formation of Chlorate and Perchlorate in Seawater

Jongchan Yi <sup>1</sup>, Yongtae Ahn <sup>1</sup>, Moongi Hong <sup>2</sup>, Gi-Hyeon Kim <sup>1</sup>, Nisha Shabnam <sup>1</sup>,  
Byongsueng Jeon <sup>2</sup>, Byoung-In Sang <sup>2</sup> and Hyunook Kim <sup>1,\*</sup>

<sup>1</sup> Department of Environmental Engineering, University of Seoul, 163 Seoulsiripdaero, Dongdaemun-gu, Seoul 02504, Korea; jcyi1989@gmail.com (J.Y.); walker34@naver.com (Y.A.); bluemelton33@gmail.com (G.-H.K.); shabnam251@gmail.com (N.S.)

<sup>2</sup> Department of Chemical Engineering, Hanyang University, 222, Wangsimni-ro, Seongdong-gu, Seoul 04763, Korea; hmg3433@naver.com (M.H.); a1trust@hanmail.net (B.J.); biosang@hanyang.ac.kr (B.-I.S.)

\* Correspondence: h\_kim@uos.ac.kr; Tel.: +82-2-6490-2871, Fax: +82-2-6490-2859

## 1. Seawater Sampling Site

Seawater samples were collected from the west coast (Yeonggwang, Korea, 35°23'27"N, 126°24'25"E) of the Korean peninsula and the east coast (Uljin, Korea, 37°01'53"N, 129°24'54"E) (Figure S1).

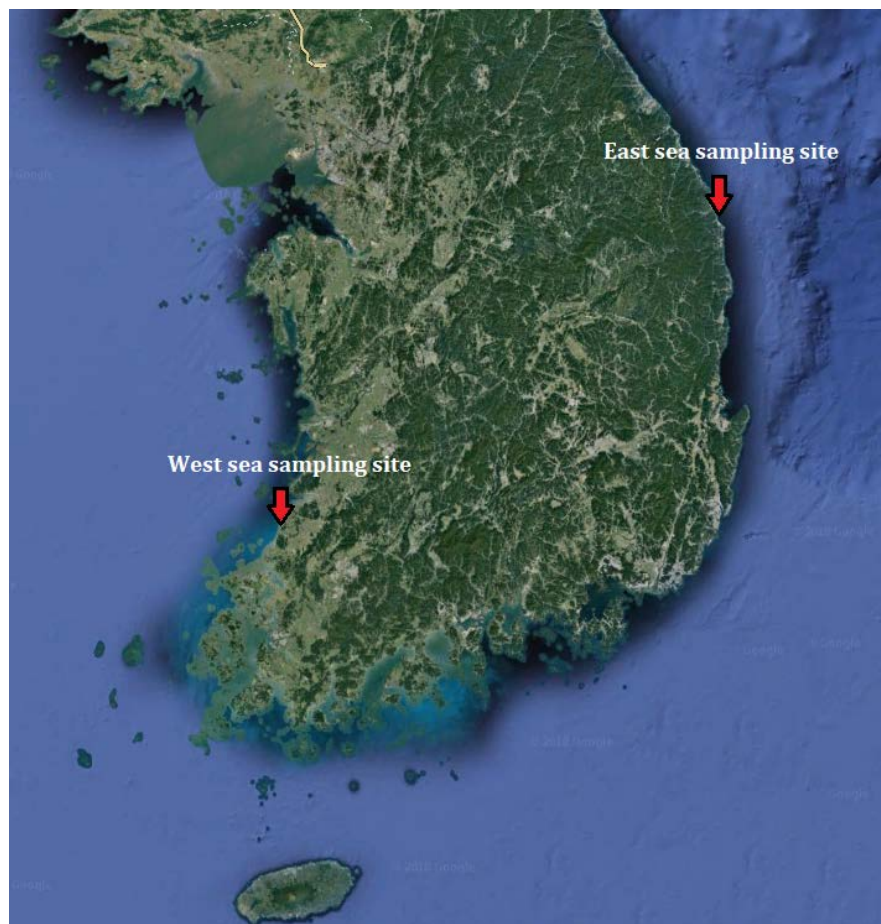

**Figure S1.** Seawater sampling site; the west sea and the east sea.

## 2. Effects of Bromine Ions during Chlorination

The electrochemical processes for generating residual oxidants, including hyperbromous acid (HOBr/OBr<sup>-</sup>) from bromine (Br<sup>-</sup>) are well known (Equations (1)–(3)) [1–5]:

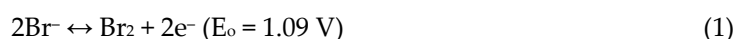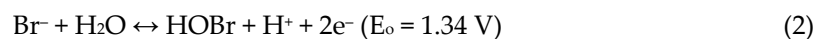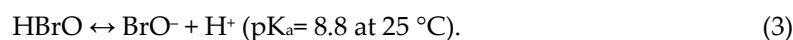

If bromine ions exist in the water, chlorine quickly changes to hyperbromous acid and ion, as in the following reactions (Equations (4),(5)):

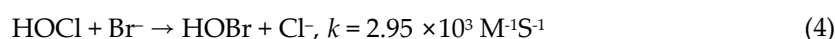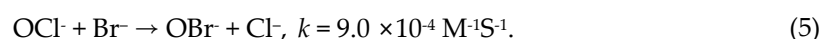

Since seawater contains a high concentration of bromine ion, chlorine is changed quickly to hyperbromous acid during seawater electrolysis. Thus, the main TRO formed during electrolysis is hyperbromous acid, despite the formation of chlorine and hyperbromous acid at the same time [6]. In that case, the hyperbromous acid could be the active form of biocide in seawater [7].

## References

1. Milazzo, G.; Caroli, S.; Braun, R.D. Tables of standard electrode potentials. *J. Electrochem. Soc.* **1978**, *125*, 261C.
2. Haag, W.R.; Hoigné, J.; Bader, H. Improved ammonia oxidation by ozone in the presence of bromide ion during water treatment. *Water Res.* **1984**, *18*, 1125–1128.
3. Cettou, P.; Robertson, P.M.; Lbl, N. On the electrolysis of aqueous bromide solutions to bromate. *Electrochim. Acta* **1984**, *29*, 875–885.
4. Pavlović, O.Ž.; Krstajić, N.V.; Spasojević, M.D. Formation of bromates at a RuO<sub>2</sub>/TiO<sub>2</sub> titanium anode. *Surf. Coat. Technol.* **1988**, *34*, 177–183.
5. von Gunten, U.; Hoigne, J. Bromate formation during ozonation of bromide-containing waters: Interaction of ozone and hydroxyl radical reactions. *Environ. Sci. Technol.* **1994**, *28*, 1234–1242.
6. Jung, Y.; Hong, E.; Yoon, Y.; Kwon, M.; Kang, J.-W. Formation of bromate and chlorate during ozonation and electrolysis in seawater for ballast water treatment. *Ozone Sci. Eng.* **2014**, *36*, 515–525.
7. Abdel-Wahab, A.; Khodary, A.; Bensalah, N. Formation of trihalomethanes during seawater chlorination. *Indian J. Environ. Prot.* **2010**, *1*, 10.
